# Supplementary material for: Metformin kills and radiosensitizes cancer cells and preferentially kills cancer stem cells
Source: PubMed Central journal article supplement — Sci Rep. 2012 Apr 12;2:362. doi: 10.1038/srep00362 (PMC3324825; doi:10.1038/srep00362), 2012-04-12
Supplement: srep00362-s1.pdf [file srep00362-s1.pdf]

Correspondence and requests for materials should be addressed to H.P. (park001@inha.ac.kr)

## Metformin kills and radiosensitizes cancer cells and preferentially kills cancer stem cells

Chang W. Song<sup>1</sup>, Hyemi Lee<sup>2</sup>, Ruud P. M. Dings<sup>3</sup>, Brent Williams<sup>1</sup>, John Powers<sup>1</sup>, Troy Dos Santos<sup>1</sup>, Bo-Hwa Choi<sup>2</sup>, Heon Joo Park<sup>1,2</sup>

<sup>1</sup>Radiobiology Laboratory, Department of Therapeutic Radiology-Radiation Oncology, University of Minnesota Medical School, Minneapolis, MN, U.S.A., <sup>2</sup>Department of Microbiology, Center for Advanced Medical Education by BK21 Project, College of Medicine, Inha University, Incheon, Korea, <sup>3</sup>Department of Biochemistry, Molecular Biology and Biophysics, University of Minnesota, Minneapolis, MN, U.S.A.

### Supplementary Figure S1

A

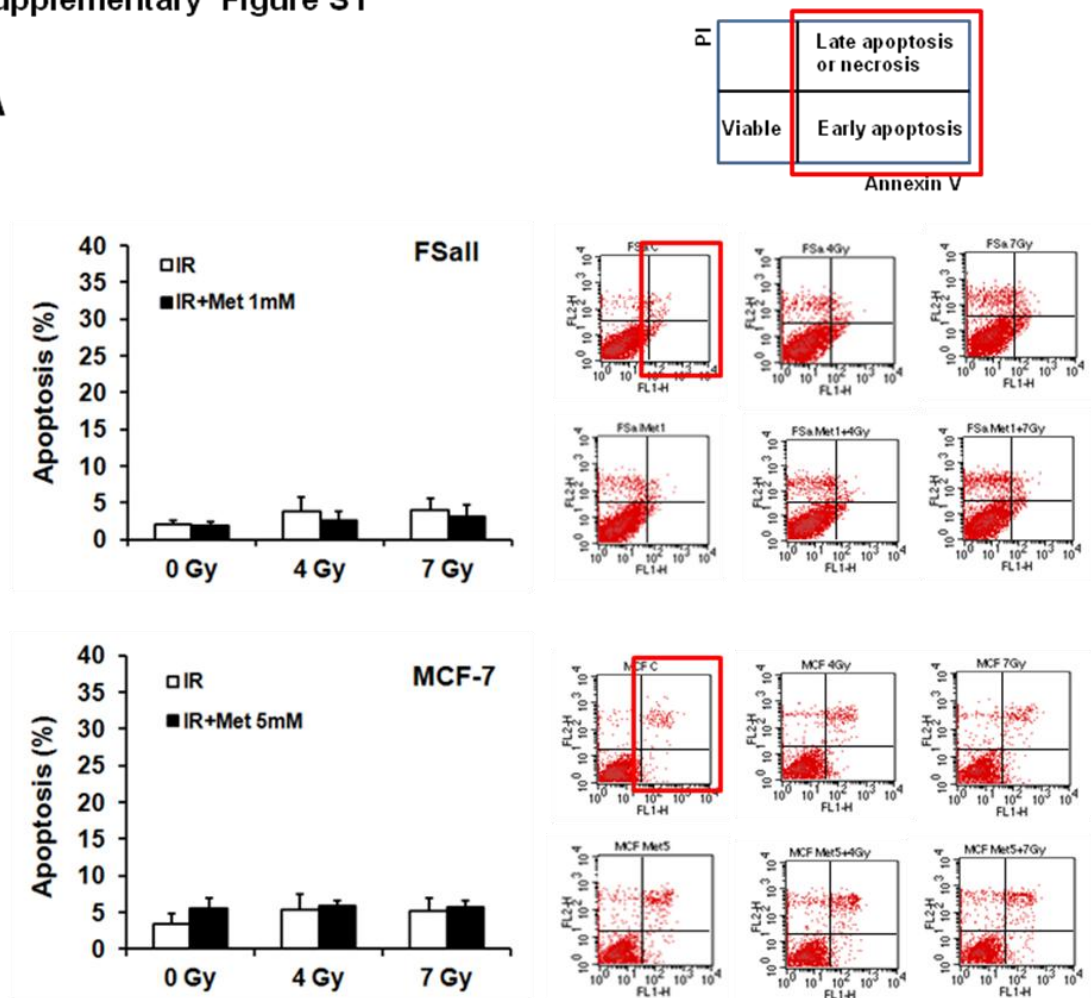

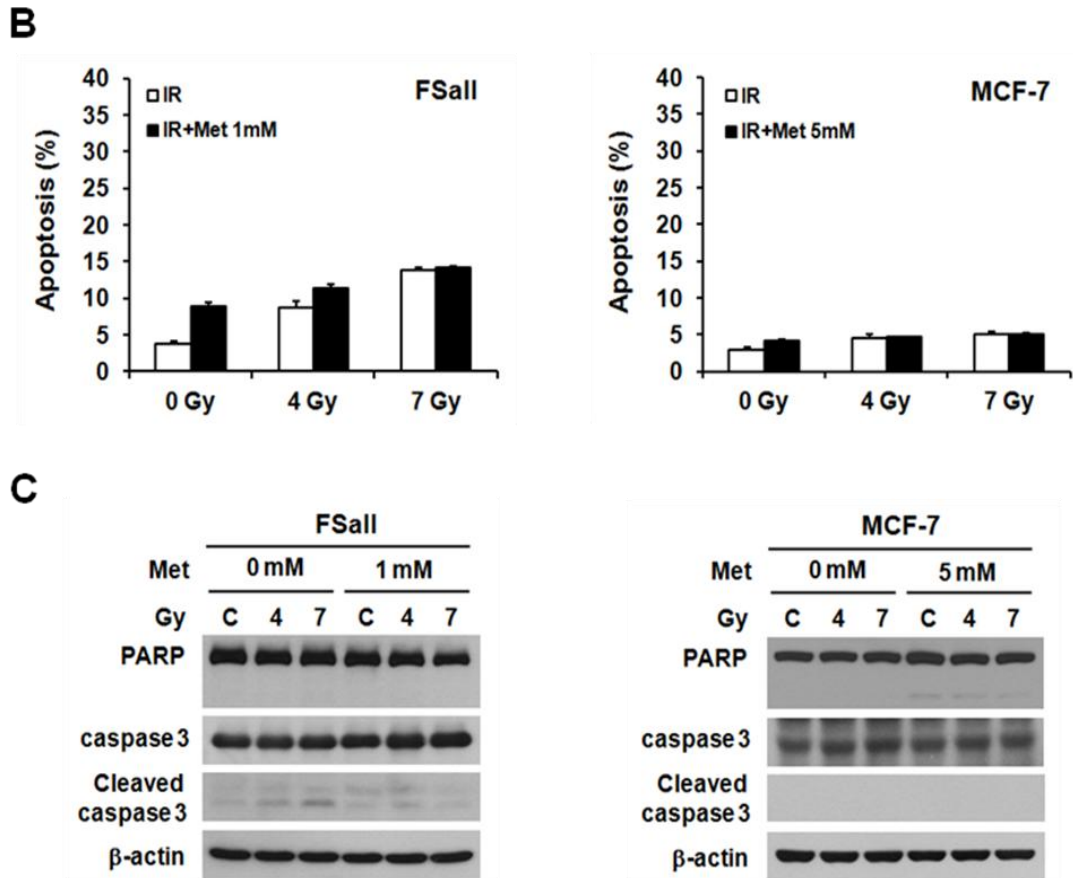

**Supplement Fig 1.** Apoptotic cell death of FSaII and MCF-7 cells treated with metformin alone or with radiation. (A): Cells were incubated with metformin for 24 h, irradiated with various doses of X-rays, and further incubated with 1 or 5 mM metformin for 24 h. Cells were stained with Annexin V/PI and apoptotic changes were measured by flow cytometry. (B): Cells were incubated with metformin for 24 h, irradiated with various doses of X-rays, and further incubated with 1 or 5 mM metformin for 24 h. Cells were stained with PI and the percentage of cells with a sub-G1 DNA content was measured by flow cytometry. (C): Cells were incubated with metformin for 24 h, irradiated with various doses of X-rays, further incubated with 1 or 5 mM metformin for 24 h. PARP, caspase-3 and  $\beta$ -actin were then analyzed by western blotting.

Supplementary Figure S2

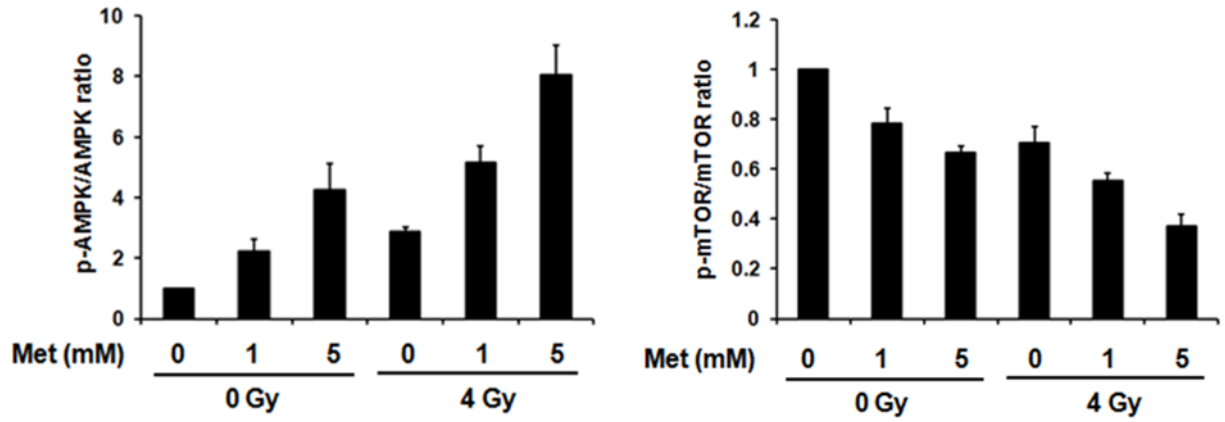

**Supplement Fig 2.** Effects of metformin or irradiation and combined on the expression of p-AMPK and p-mTOR. This is supplemental data for the figures 2. The band intensities of p-AMPK, AMPK, p-mTOR, mTOR were measured using ImageJ 1.41 software (NIH, Bethesda, MD). Averages of 4-5 experiments are shown.

Supplementary Figure S3

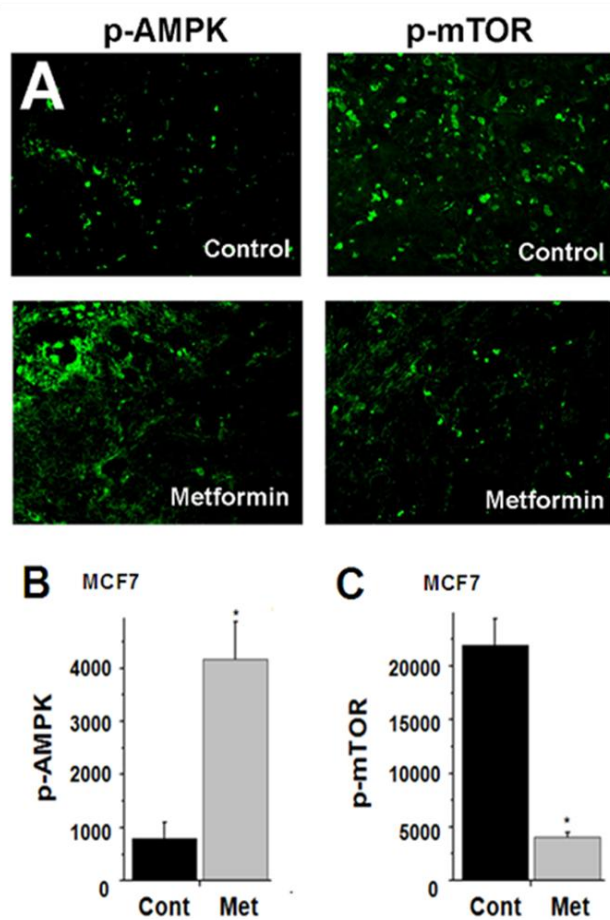

**Supplement Fig 3.** Immunohistological study for the expression of p-AMPK and p-mTOR in MCF-7 tumors. The cross-sections were stained and quantified for p-AMPK (A left panels and B) and p-mTOR (A right panels and C). All results are expressed as mean pixel counts per image  $\pm$  standard error from 20 images derived from 3 tumors per group (magnification 200x). Representative images illustrating the average amount of staining are depicted in panel A for each treatment modality as indicated. \* $P < 0.001$  Metformin group vs. vehicle
